# Supplementary material for: Association of the vitamin D metabolism gene GC and CYP27B1 polymorphisms with cancer susceptibility: a meta-analysis and trial sequential analysis
Source: PubMed Central journal article supplement (PMC6744587; doi:10.1042/bsr20190368), 2019-09-13
Supplement: bsr20190368_Supp1.pdf [file bsr20190368_Supp1.pdf]

## Supplementary Materials

### Supplementary Tables

**Table S1** The detailed search strategies of the associations between GC (rs4588, rs7041), CYP27B1 (rs4646537, and rs3782130) polymorphisms and cancer risk

| Database | Search strategy                                                                                                                                                                                                                                                                                                                                                                                                                                                                                                                                                                        |
|----------|----------------------------------------------------------------------------------------------------------------------------------------------------------------------------------------------------------------------------------------------------------------------------------------------------------------------------------------------------------------------------------------------------------------------------------------------------------------------------------------------------------------------------------------------------------------------------------------|
| Pubmed   | #1: Polymorphism, genetic<br>#2: Polymorphism*<br>#3: SNP<br>#4: Single nucleotide polymorphism<br>#5: Variant<br>#6: Mutation<br>#7: #1 OR #2 OR #3 OR #4 OR #5 OR #6<br>#8: rs4588<br>#9: rs7041<br>#10: rs4646537<br>#11: rs3782130<br>#12: vitamin D-binding protein<br>#13: CYP27B1<br>#14: #8 OR #9 OR #10 OR #11 OR #12 OR #13<br>#15: Neoplasms<br>#16: Cancer<br>#17: Carcino*<br>#18: #15 OR #16 OR #17<br>#19: #7 AND #14 AND #18                                                                                                                                           |
| Embase   | #1: 'neoplasm'/exp OR<br>#2: cancer OR tumor OR<br>#3: tumor carcinoma OR<br>#4: carcinoma carcinogenesis) AND<br>#5: carcinogenesis (rs4588 OR rs7041 OR<br>#6: #1 OR #2 OR #3 OR #4 OR #5 rs4646537 OR rs3782130<br>#7: rs4588 OR CYP24A1 OR<br>#8: rs7041 vitamin D-binding protein<br>#9: rs4646537 OR CYP27B1) AND<br>#10: rs3782130 ('single nucleotide<br>#11: vitamin D-binding protein polymorphism'/exp OR<br>#12: CYP27B1 SNP OR polymorphism<br>#13: #7 OR #8 OR #9 OR #10 OR #11 OR #12 OR variant OR<br>#14: 'single nucleotide polymorphism'/exp mutation))<br>#15: SNP |

---

#16: polymorphism

#17: variant

#18: mutation

#19: #14 OR #15 OR #16 OR #17 OR #18

#20: #6 AND #13 AND #19

---

**Table S2.** Score of quality assessment

| Criteria                                          | Score |
|---------------------------------------------------|-------|
| Representativeness of case                        |       |
| Selected from population cancer registry          | 2     |
| Selected from hospital                            | 1     |
| No method of selection described                  | 0     |
| Representativeness of control                     |       |
| Population-based                                  | 3     |
| Blood donors                                      | 2     |
| Hospital-based                                    | 1     |
| Not described                                     | 0     |
| Ascertainment of cancer case                      |       |
| Histopathologic confirmation                      | 2     |
| By patient medical record                         | 1     |
| Not described                                     | 0     |
| Control selection                                 |       |
| Controls matched with cases by age and sex        | 2     |
| Controls matched with cases only by age or by sex | 1     |
| Not matched or not described                      | 0     |
| Genotyping examination                            |       |
| Genotyping done blindly and quality control       | 2     |
| Only genotyping done blindly or quality control   | 1     |
| Unblinded and without quality control             | 0     |
| HWE                                               |       |
| HWE in the control group                          | 1     |
| HWD in the control group or not mentioned         | 0     |
| Total sample size                                 |       |
| > 1000                                            | 3     |
| 501 - 1000                                        | 2     |
| 201 - 500                                         | 1     |
| ≤ 200                                             | 0     |

**Table S3.** False-positive report probability values for associations between the rs7041 polymorphism and cancer risk

| Significant association    | OR (95%CI)       | <i>P</i> <sup>a</sup> | Statistical power <sup>b</sup> | Prior probability |              |              |              |              |
|----------------------------|------------------|-----------------------|--------------------------------|-------------------|--------------|--------------|--------------|--------------|
|                            |                  |                       |                                | 0.25              | 0.1          | 0.01         | 0.001        | 0.0001       |
| <b>Dominant</b>            |                  |                       |                                |                   |              |              |              |              |
| Overall                    | 1.22(1.03, 1.44) | 0.019                 | 0.993                          | <b>0.054</b>      | <b>0.145</b> | 0.651        | 0.950        | 0.995        |
| PB                         | 1.28(1.04, 1.59) | 0.023                 | 0.924                          | <b>0.077</b>      | 0.200        | 0.733        | 0.965        | 0.996        |
| <b>Recessive</b>           |                  |                       |                                |                   |              |              |              |              |
| Overall                    | 1.27(1.02, 1.58) | 0.030                 | 0.932                          | <b>0.093</b>      | 0.236        | 0.772        | 0.972        | 0.997        |
| Asian                      | 1.40(1.11, 1.77) | 0.005                 | 0.718                          | <b>0.020</b>      | <b>0.058</b> | <b>0.404</b> | <b>0.873</b> | <b>0.986</b> |
| Non-small cell lung cancer | 1.73(1.05, 2.84) | 0.031                 | 0.286                          | 0.240             | 0.487        | 0.913        | 0.991        | 0.999        |
| PB                         | 1.30(1.01, 1.68) | 0.045                 | 0.863                          | <b>0.135</b>      | 0.319        | 0.837        | 0.981        | 0.998        |
| PCR-RFLP                   | 1.55(1.10, 2.19) | 0.013                 | 0.426                          | <b>0.084</b>      | 0.215        | 0.750        | 0.968        | 0.997        |
| <b>Homozygote</b>          |                  |                       |                                |                   |              |              |              |              |
| Overall                    | 1.41(1.06, 1.88) | 0.017                 | 0.663                          | <b>0.080</b>      | 0.207        | 0.742        | 0.967        | 0.997        |
| Asian                      | 1.52(1.19, 1.93) | 0.001                 | 0.457                          | <b>0.004</b>      | <b>0.011</b> | <b>0.113</b> | 0.563        | 0.928        |
| Non-small cell lung cancer | 1.97(1.38, 2.81) | 0.000                 | 0.066                          | <b>0.008</b>      | <b>0.024</b> | 0.214        | 0.734        | 0.965        |
| PB                         | 1.49(1.05, 2.09) | 0.024                 | 0.515                          | <b>0.108</b>      | 0.267        | 0.801        | 0.976        | 0.998        |
| PCR-RFLP                   | 1.66(1.03, 2.69) | 0.039                 | 0.340                          | 0.259             | 0.512        | 0.920        | 0.991        | 0.999        |
| <b>Heterozygote</b>        |                  |                       |                                |                   |              |              |              |              |
| Asian                      | 1.28(1.00, 1.63) | 0.047                 | 0.901                          | <b>0.131</b>      | 0.312        | 0.833        | 0.980        | 0.998        |
| PCR-RFLP                   | 1.48(1.09, 2.01) | 0.013                 | 0.534                          | <b>0.063</b>      | <b>0.169</b> | 0.691        | 0.958        | 0.996        |
| <b>Allele</b>              |                  |                       |                                |                   |              |              |              |              |
| Overall                    | 1.17(1.02, 1.33) | 0.022                 | 1.000                          | <b>0.047</b>      | <b>0.128</b> | 0.618        | 0.942        | 0.994        |
| Asian                      | 1.20(1.09, 1.32) | 0.000                 | 1.000                          | <b>0.001</b>      | <b>0.002</b> | <b>0.017</b> | <b>0.150</b> | 0.639        |
| Non-small cell lung cancer | 1.32(1.09, 1.60) | 0.004                 | 0.904                          | <b>0.015</b>      | <b>0.044</b> | 0.339        | 0.838        | 0.981        |

|    |                  |       |       |              |       |       |       |       |
|----|------------------|-------|-------|--------------|-------|-------|-------|-------|
| PB | 1.20(1.02, 1.42) | 0.029 | 0.995 | <b>0.092</b> | 0.234 | 0.771 | 0.971 | 0.997 |
|----|------------------|-------|-------|--------------|-------|-------|-------|-------|

---

The results in false-positive report probability analysis were in bold, if the prior probability  $<0.2$ . OR: odds ratio; CI: confidence interval; <sup>a</sup>  $P$  value for significant test; <sup>b</sup> Statistical power was calculated using the number of observations in the meta-analysis and the OR and  $P$  value in this table.

**Table S4.** False-positive report probability values for associations between the rs4588 polymorphism and cancer risk

| Significant association | OR (95%CI)       | <i>P</i> <sup>a</sup> | Statistical power <sup>b</sup> | Prior probability |              |              |              |        |
|-------------------------|------------------|-----------------------|--------------------------------|-------------------|--------------|--------------|--------------|--------|
|                         |                  |                       |                                | 0.25              | 0.1          | 0.01         | 0.001        | 0.0001 |
| <b>Dominant</b>         |                  |                       |                                |                   |              |              |              |        |
| Overall                 | 1.10(1.02, 1.19) | 0.016                 | 1.000                          | <b>0.050</b>      | <b>0.136</b> | 0.634        | 0.946        | 0.994  |
| Caucasian               | 1.10(1.01, 1.21) | 0.040                 | 1.000                          | <b>0.130</b>      | 0.310        | 0.832        | 0.980        | 0.998  |
| Breast cancer           | 1.10(1.00, 1.21) | 0.046                 | 1.000                          | <b>0.130</b>      | 0.310        | 0.832        | 0.980        | 0.998  |
| PB                      | 1.10(1.00, 1.20) | 0.040                 | 1.000                          | <b>0.087</b>      | 0.223        | 0.759        | 0.969        | 0.997  |
| High quality (> 9)      | 1.16(1.02, 1.32) | 0.047                 | 1.000                          | <b>0.068</b>      | <b>0.180</b> | 0.707        | 0.961        | 0.996  |
| <b>Recessive</b>        |                  |                       |                                |                   |              |              |              |        |
| Overall                 | 1.27(1.11, 1.46) | 0.001                 | 0.990                          | <b>0.002</b>      | <b>0.007</b> | <b>0.072</b> | 0.440        | 0.887  |
| Caucasian               | 1.17(1.00, 1.39) | 0.049                 | 0.998                          | <b>0.182</b>      | 0.401        | 0.880        | 0.987        | 0.999  |
| Asian                   | 1.51(1.18, 1.94) | 0.001                 | 0.479                          | <b>0.008</b>      | <b>0.023</b> | 0.207        | 0.725        | 0.964  |
| Digestive system tumor  | 1.58(1.02, 2.46) | 0.042                 | 0.409                          | 0.239             | 0.485        | 0.912        | 0.991        | 0.999  |
| PB                      | 1.19(1.02, 1.40) | 0.029                 | 0.997                          | <b>0.097</b>      | 0.245        | 0.781        | 0.973        | 0.997  |
| HB                      | 1.58(1.02, 2.46) | 0.042                 | 0.409                          | 0.239             | 0.485        | 0.912        | 0.991        | 0.999  |
| PCR-RFLP                | 1.35(1.13, 1.61) | 0.001                 | 0.879                          | <b>0.003</b>      | <b>0.009</b> | <b>0.086</b> | 0.488        | 0.905  |
| High quality (> 9)      | 1.55(1.23, 1.96) | 0.000                 | 0.392                          | <b>0.002</b>      | <b>0.006</b> | <b>0.060</b> | 0.391        | 0.865  |
| <b>Homozygote</b>       |                  |                       |                                |                   |              |              |              |        |
| Overall                 | 1.31(1.13, 1.51) | 0.000                 | 0.969                          | <b>0.001</b>      | <b>0.002</b> | <b>0.020</b> | <b>0.168</b> | 0.668  |
| Caucasian               | 1.22(1.02, 1.45) | 0.026                 | 0.990                          | <b>0.068</b>      | <b>0.179</b> | 0.706        | 0.960        | 0.996  |
| Asian                   | 1.56(1.06, 2.29) | 0.024                 | 0.421                          | <b>0.142</b>      | 0.331        | 0.845        | 0.982        | 0.998  |
| Breast cancer           | 1.20(1.00, 1.43) | 0.047                 | 0.994                          | <b>0.111</b>      | 0.273        | 0.805        | 0.977        | 0.998  |
| PB                      | 1.23(1.05, 1.45) | 0.013                 | 0.991                          | <b>0.040</b>      | <b>0.110</b> | 0.577        | 0.932        | 0.993  |
| PCR-RFLP                | 1.45(1.08, 1.94) | 0.014                 | 0.590                          | <b>0.059</b>      | <b>0.159</b> | 0.675        | 0.954        | 0.995  |

|                        |                  |       |       |              |              |              |       |       |
|------------------------|------------------|-------|-------|--------------|--------------|--------------|-------|-------|
| High quality (> 9)     | 1.59(1.25, 2.04) | 0.000 | 0.323 | <b>0.002</b> | <b>0.007</b> | <b>0.075</b> | 0.450 | 0.891 |
| <b>Heterozygote</b>    |                  |       |       |              |              |              |       |       |
| Overall                | 1.23(1.06, 1.42) | 0.005 | 0.997 | <b>0.014</b> | <b>0.041</b> | 0.320        | 0.826 | 0.979 |
| Asian                  | 1.51(1.16, 1.96) | 0.002 | 0.480 | <b>0.012</b> | <b>0.035</b> | 0.287        | 0.803 | 0.976 |
| Digestive system tumor | 1.54(1.15, 2.08) | 0.004 | 0.432 | <b>0.033</b> | <b>0.092</b> | 0.528        | 0.918 | 0.991 |
| PCR-RFLP               | 1.34(1.12, 1.62) | 0.002 | 0.878 | <b>0.008</b> | <b>0.025</b> | 0.220        | 0.740 | 0.966 |
| High quality (> 9)     | 1.51(1.18, 1.93) | 0.001 | 0.479 | <b>0.006</b> | <b>0.018</b> | <b>0.171</b> | 0.675 | 0.954 |
| <b>Allele</b>          |                  |       |       |              |              |              |       |       |
| Overall                | 1.11(1.05, 1.18) | 0.001 | 1.000 | <b>0.002</b> | <b>0.007</b> | <b>0.075</b> | 0.451 | 0.892 |
| Caucasian              | 1.10(1.02, 1.18) | 0.015 | 1.000 | <b>0.023</b> | <b>0.066</b> | 0.436        | 0.886 | 0.987 |
| Breast cancer          | 1.09(1.01, 1.17) | 0.030 | 1.000 | <b>0.049</b> | <b>0.133</b> | 0.628        | 0.945 | 0.994 |
| PB                     | 1.10(1.02, 1.17) | 0.010 | 1.000 | <b>0.007</b> | <b>0.022</b> | <b>0.196</b> | 0.711 | 0.961 |
| PCR-RFLP               | 1.10(1.02, 1.19) | 0.014 | 1.000 | <b>0.050</b> | <b>0.136</b> | 0.634        | 0.946 | 0.994 |
| High quality (> 9)     | 1.19(1.07, 1.33) | 0.001 | 1.000 | <b>0.006</b> | <b>0.019</b> | <b>0.177</b> | 0.685 | 0.956 |

The results in false-positive report probability analysis were in bold, if the prior probability <0.2. OR: odds ratio; CI: confidence interval; <sup>a</sup> *P* value for significant test; <sup>b</sup> Statistical power was calculated using the number of observations in the meta-analysis and the OR and *P* value in this table.

**Table S5.** Meta-analysis of associations between rs4646537 and rs3782130 polymorphisms and cancer risk

| Variables          | N | Dominant model                            | Recessive model                           | Homozygote model                          | Heterozygote model                        | Allele model                              |
|--------------------|---|-------------------------------------------|-------------------------------------------|-------------------------------------------|-------------------------------------------|-------------------------------------------|
|                    |   | OR(95%CI)/I <sup>2</sup> %/P <sub>Q</sub> | OR(95%CI)/I <sup>2</sup> %/P <sub>Q</sub> | OR(95%CI)/I <sup>2</sup> %/P <sub>Q</sub> | OR(95%CI)/I <sup>2</sup> %/P <sub>Q</sub> | OR(95%CI)/I <sup>2</sup> %/P <sub>Q</sub> |
| <b>rs4646537</b>   |   |                                           |                                           |                                           |                                           |                                           |
| Overall            | 3 | 0.92(0.76, 1.10)/0/0.675                  | 0.77(0.55, 1.09)/0/0.615                  | 0.76(0.53, 1.10)/0/0.610                  | 0.78(0.54, 1.12)/0/0.695                  | 0.91(0.79, 1.05)/0/0.591                  |
| Caucasian          | 2 | 0.91(0.75, 1.10)/0/0.419                  | 0.77(0.54, 1.09)/0/0.353                  | 0.76(0.52, 1.09)/0/0.351                  | 0.78(0.54, 1.12)/0/0.424                  | 0.90(0.78, 1.04)/0/0.357                  |
| African            | 1 | 1.04(0.52, 2.07)                          | 1.17(0.10, 13.13)                         | 1.18(0.10, 13.31)                         | 1.14(0.10, 13.62)                         | 1.04(0.56, 1.94)                          |
| Prostate cancer    | 3 | 0.92(0.76, 1.10)/0/0.675                  | 0.77(0.55, 1.09)/0/0.615                  | 0.76(0.53, 1.10)/0/0.610                  | 0.78(0.54, 1.12)/0/0.695                  | 0.91(0.79, 1.05)/0/0.591                  |
| PCR-RFLP           | 2 | 0.95(0.78, 1.16)/0/0.793                  | 0.79(0.56, 1.13)/0/0.752                  | 0.79(0.55, 1.14)/0/0.743                  | 0.80(0.56, 1.15)/0/0.776                  | 0.93(0.80, 1.08)/0/0.710                  |
| SNPlex assay       | 1 | 0.77(0.49, 1.20)                          | 0.19(0.01, 3.86)                          | 0.18(0.01, 3.80)                          | 0.23(0.01, 4.85)                          | 0.74(0.48, 1.15)                          |
| High quality (> 9) | 2 | 0.91(0.75, 1.10)/0/0.419                  | 0.77(0.54, 1.09)/0/0.353                  | 0.76(0.52, 1.09)/0/0.351                  | 0.78(0.54, 1.12)/0/0.424                  | 0.90(0.78, 1.04)/0/0.357                  |
| Low quality (≤ 9)  | 1 | 1.04(0.52, 2.07)                          | 1.17(0.10, 13.13)                         | 1.18(0.10, 13.31)                         | 1.14(0.10, 13.62)                         | 1.04(0.56, 1.94)                          |
| <b>rs3782130</b>   |   |                                           |                                           |                                           |                                           |                                           |
| Overall            | 6 | 0.99(0.87, 1.11)/0/0.533                  | 1.14(0.95, 1.38)/0/0.417                  | 1.11(0.91, 1.35)/0/0.526                  | 1.19(0.97, 1.44)/1.4/0.407                | 1.02(0.94, 1.12)/0/0.665                  |
| Caucasian          | 2 | 1.09(0.89, 1.33)/0/0.616                  | 1.21(0.85, 1.73)/0/0.353                  | 1.27(0.87, 1.84)/0/0.369                  | 1.16(0.80, 1.69)/0/0.329                  | 1.10(0.94, 1.29)/0/0.760                  |
| African            | 1 | 1.05(0.44, 2.52)                          | 1.11(0.10, 12.46)                         | 1.11(0.10, 12.56)                         | 1.07(0.08, 13.65)                         | 1.06(0.47, 2.34)                          |
| Asian              | 3 | 0.93(0.79, 1.10)/13/0.317                 | 1.13(0.82, 1.55)/50/0.134                 | 1.06(0.84, 1.33)/28/0.251                 | 1.18(0.84, 1.67)/51/0.130                 | 0.99(0.89, 1.11)/3/0.357                  |
| Prostate cancer    | 3 | 1.09(0.89, 1.33)/0/0.879                  | 1.21(0.85, 1.72)/0/0.648                  | 1.26(0.87, 1.83)/0/0.665                  | 1.16(0.80, 1.68)/0/0.620                  | 1.10(0.94, 1.28)/0/0.950                  |
| NSCLC              | 2 | 0.87(0.73, 1.04)/0/0.976                  | 1.14(0.70, 1.85)/75/0.045                 | 1.04(0.68, 1.57)/61/0.111                 | 1.24(0.75, 2.05)/73/0.053                 | 0.96(0.85, 1.09)/0/0.331                  |
| Colorectal cancer  | 1 | 1.14(0.84, 1.55)                          | 1.12(0.68, 1.83)                          | 1.18(0.70, 1.98)                          | 1.04(0.62, 1.77)                          | 1.11(0.88, 1.40)                          |
| PCR-RFLP           | 4 | 0.98(0.83, 1.17)/0/0.616                  | 0.98(0.74, 1.28)/0/0.638                  | 0.96(0.72, 1.29)/0/0.517                  | 1.01(0.75, 1.36)/0/0.753                  | 0.98(0.86, 1.13)/0/0.558                  |
| Other methods      | 2 | 0.99(0.77, 1.27)/57/0.128                 | 1.32(0.96, 1.69)/0/0.395                  | 1.26(0.96, 1.65)/0/0.864                  | 1.35(0.94, 1.76)/42/0.189                 | 1.06(0.94, 1.19)/0/0.443                  |
| High quality (> 9) | 4 | 0.96(0.84, 1.09)/1/0.387                  | 1.15(0.94, 1.40)/40/0.173                 | 1.10(0.89, 1.36)/27/0.251                 | 1.21(0.98, 1.50)/38/0.186                 | 1.01(0.92, 1.11)/0/0.558                  |
| Low quality (≤ 9)  | 2 | 1.13(0.85, 1.51)/0/0.861                  | 1.12(0.95, 1.38)/0/0.995                  | 1.18(0.71, 1.95)/0/0.963                  | 1.04(0.62, 1.75)/0/0.986                  | 1.10(0.88, 1.38)/0/0.907                  |

Abbreviation: OR: Odds ratio; CI: Confidence interval; P<sub>Q</sub>: P value of the Q-test for heterogeneity test.



## Supplementary Figures

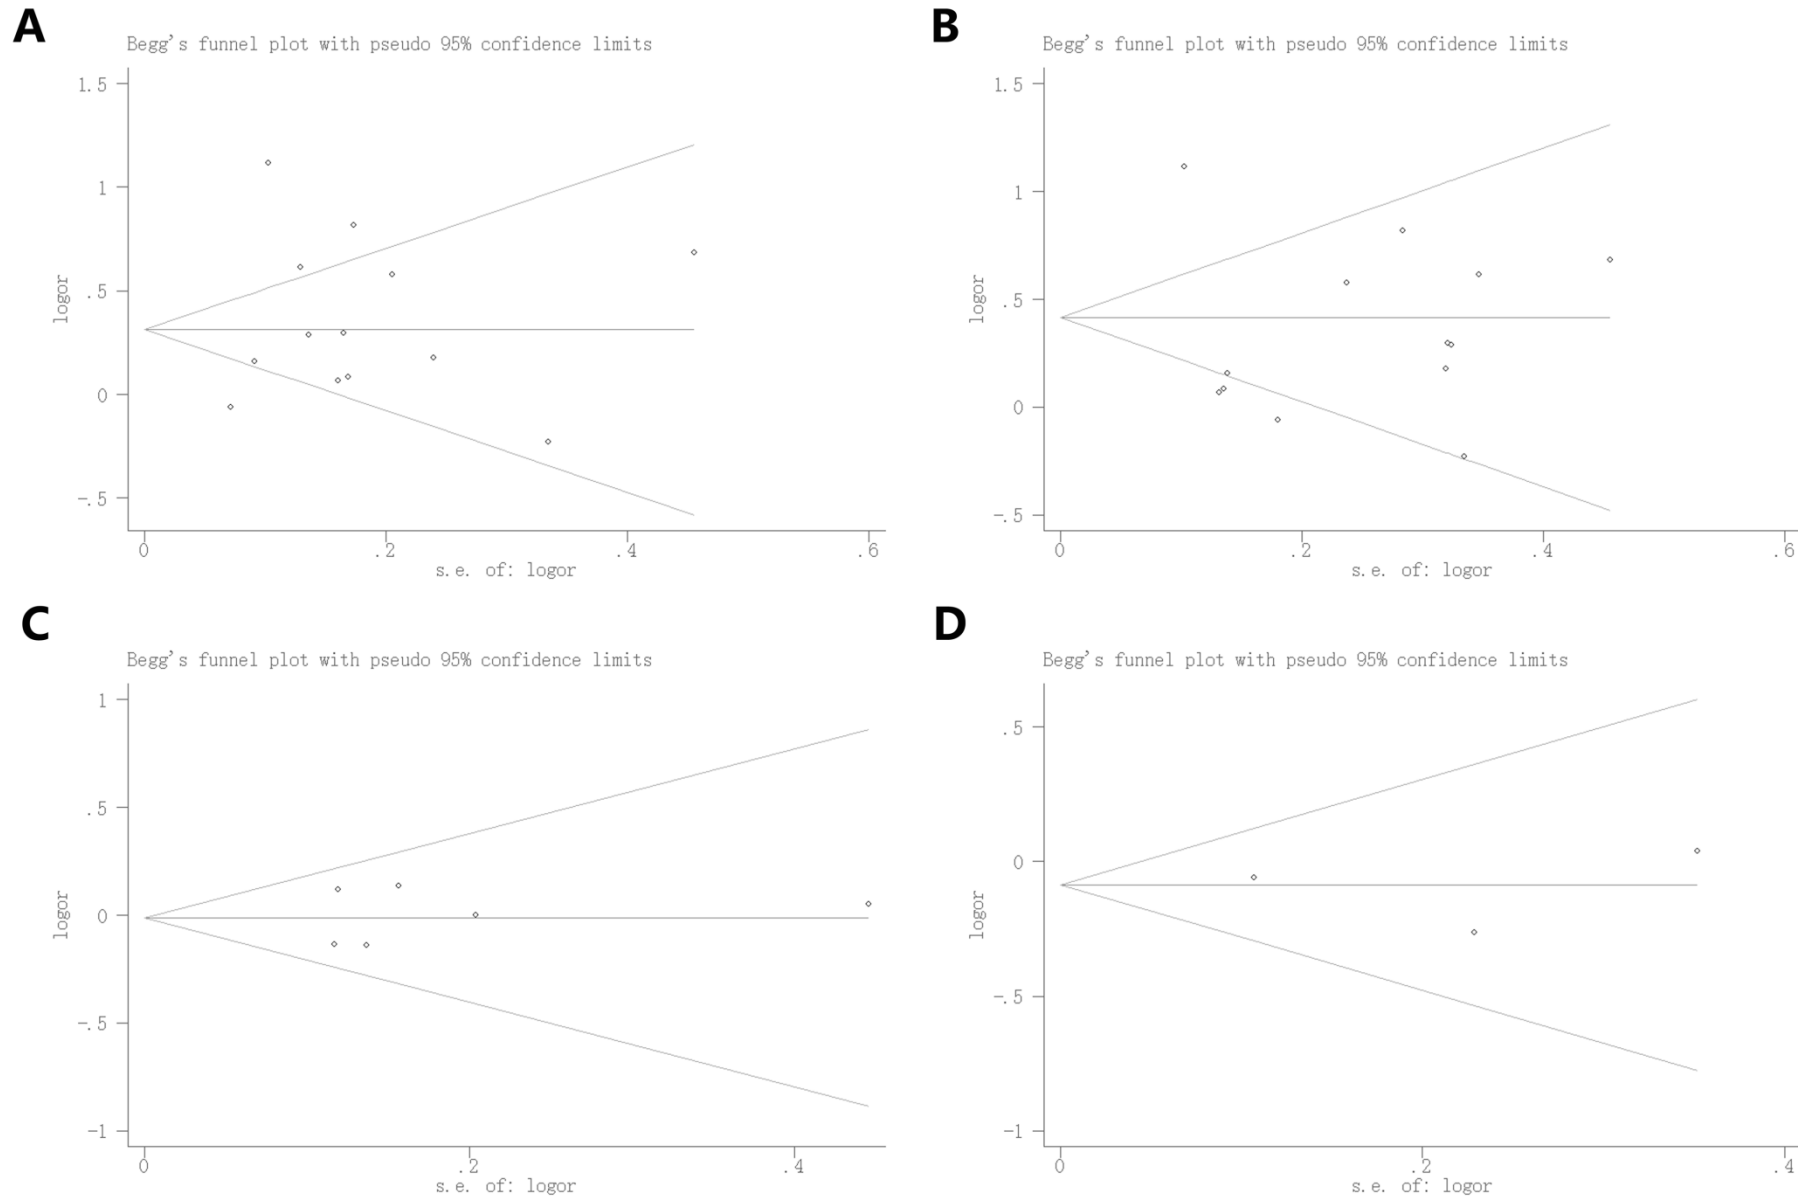

**Figure S1. Begg's test for publication bias (dominant model). A rs4588; B rs7041; C rs3782130; D rs4646537**

**A**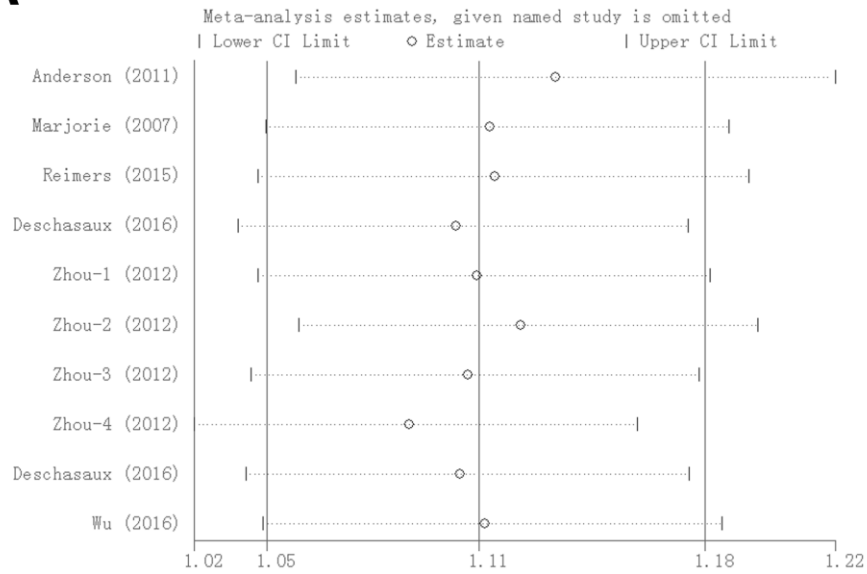**B**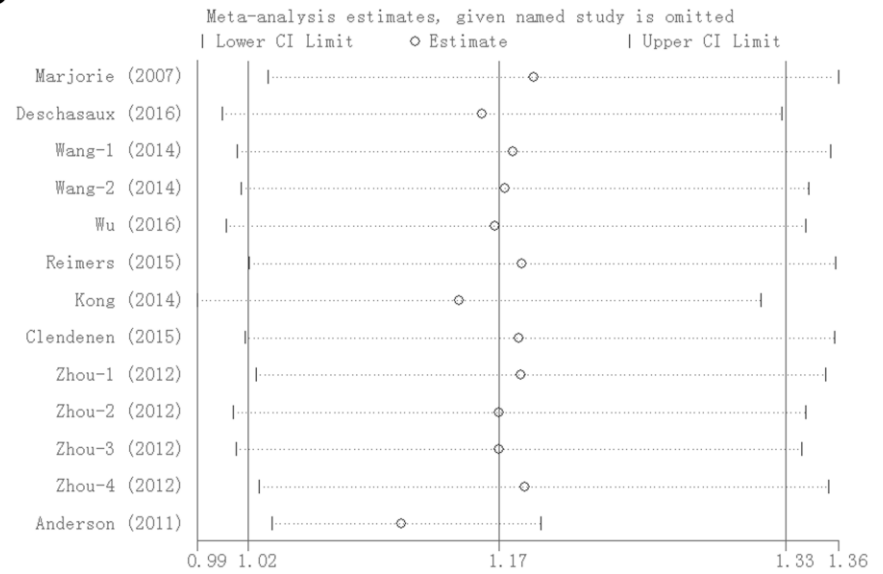**C**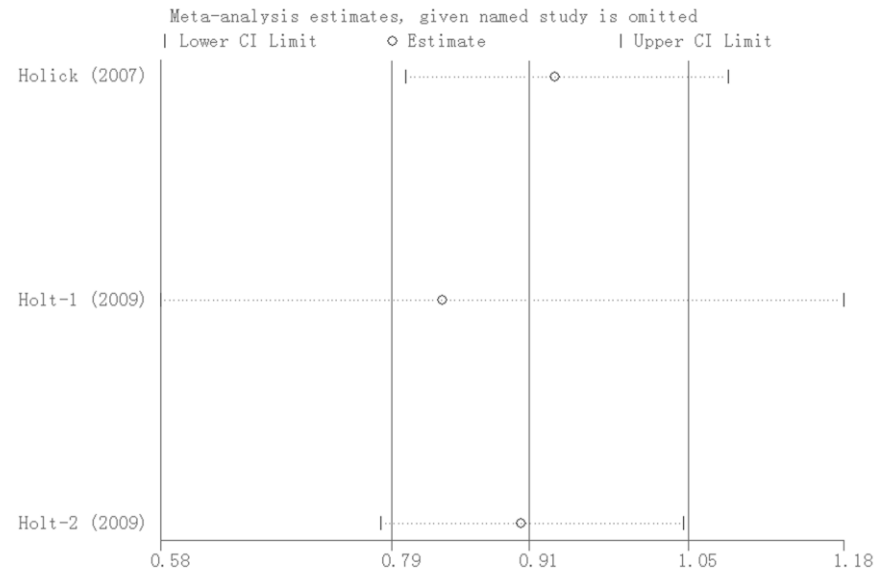**D**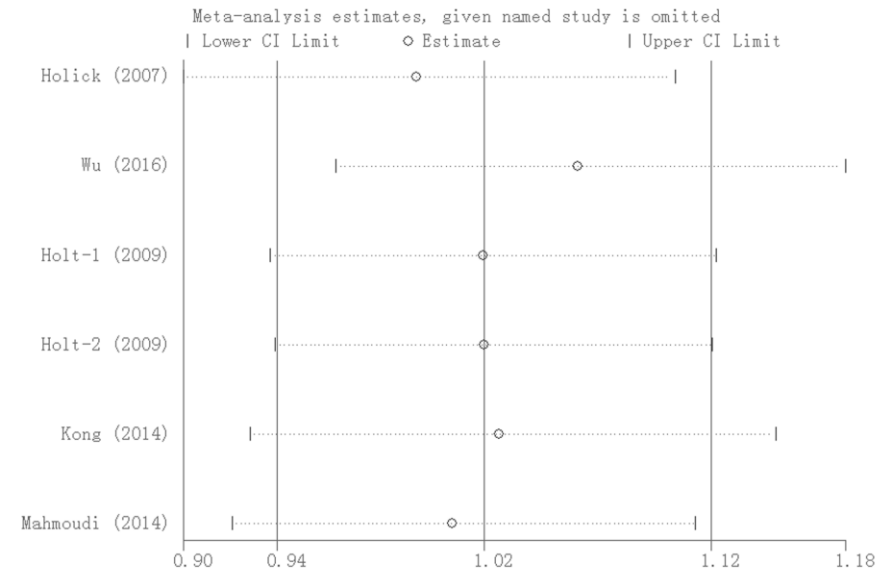

**Figure S2. Sensitivity analyses of the studies (allele model). A rs4588; B rs7041; C rs4646537; D rs3782130**
